# Supplementary material for: Fire and Landscape Configuration Shape Forest Futures: Direct and Indirect Drivers of Seedling Diversity in a Human-Modified Tropical Rainforest
Source: Research Square preprint supplement (doi:10.21203/rs.3.rs-7430288/v1), 2025-09-10
Supplement: Supplementary file 1 [file 0ceffc8e8981547c5ddd16ca.docx]

**Fire and Landscape Configuration Shape Forest Futures: Direct and Indirect Drivers of Seedling Diversity in a Human-Modified Tropical Rainforest**

*Landscape Ecology*

Sergio Nicasio-Arzeta, Susana Maza-Villalobos, Aline Pingarroni, Isela Zermeño-Hernández and Julieta Benítez-Malvido

Corresponding author: Susana Maza-Villalobos

El Colegio de la Frontera Sur, Unidad San Cristóbal de Las Casas, Carretera Panamericana y Periférico Sur s/n. Barrio María Auxiliadora, C.P. 29290, San Cristóbal de Las Casas, Chiapas.Email address: [sumaza@ecosur.mx](mailto:sumaza@ecosur.mx)

**Table S5**. Abbreviation and description of the landscape metrics employed in the analysis

| Landscape metric | Abbreviation | Formula | Description |
| --- | --- | --- | --- |
| Aggregation index | AI |  | Where *gii* is the number of joins between pixels of forest patch *i* and *max→gii* is the maximum number of joins between pixels of forest patch *i* based on the single-count method |
| Edge contrast index | EC |  | Where *pijk* is the edge length (m) of patch *ij* adjacent to cover type *k*, *dik* is the edge contrast weight between patch *i* and cover *k*, and *pij* is the length of perimeter of patch *ij* |
| Forest cover | FC |  | Where *a* is the area (m2) of forest patch *i* and *A* the is the total landscape area |
| Secondary forest | SF |  | Where *a* is the area (m2) of cover patch *i* and *A* the is the total landscape area |
| Patch density | PD |  | Where *ni* is the total number of patches in the landscape of the land cover *i* and *A* is the total landscape area (m2) |
