# Supplementary material for: Fire and Landscape Configuration Shape Forest Futures: Direct and Indirect Drivers of Seedling Diversity in a Human-Modified Tropical Rainforest
Source: Research Square preprint supplement (doi:10.21203/rs.3.rs-7430288/v1), 2025-09-10
Supplement: Supplementary file 2 [file 20d63727492294448e3bbfbf.docx]

**Fire and Landscape Configuration Shape Forest Futures: Direct and Indirect Drivers of Seedling Diversity in a Human-Modified Tropical Rainforest**

*Landscape Ecology*

Sergio Nicasio-Arzeta, Susana Maza-Villalobos, Aline Pingarroni, Isela Zermeño-Hernández and Julieta Benítez-Malvido

Corresponding author: Susana Maza-Villalobos

El Colegio de la Frontera Sur, Unidad San Cristóbal de Las Casas, Carretera Panamericana y Periférico Sur s/n. Barrio María Auxiliadora, C.P. 29290, San Cristóbal de Las Casas, Chiapas.Email address: [sumaza@ecosur.mx](mailto:sumaza@ecosur.mx)

**Table S1.** Seedling species recorded in 16 forest patches in the Lacandona rainforest, southeast Mexico.

| Family | Specie | Abbreviation | Light | Dispersion | Number |
| --- | --- | --- | --- | --- | --- |
| ACANTHACEAE | *Bravaisia integerrima* | Br.in | L | A | 29 |
| ANACARDIACEAE | *Astronium graveolens* | As.gr | L | B | 1 |
| *Spondias mombin* | Sp.mo | L | B | 7 |
| *Spondias radlkoferi* | Sp.ra | L | B | 4 |
| ANNONACEAE | *Annona sp* | An.sp | S | B | 4 |
| *Xylopia frutescens* | Xy.fr | L | B | 1 |
| APOCYNACEAE | *Stemmadenia galeottiana* | St.ga | S | B | 2 |
| BIGNONIACEAE | *Tabebuia rosea* | Ta.ro | S | A | 1 |
| BORAGINACEAE | *Cordia bicolor* | Co.bi | L | B | 2 |
| *Cordia odorata* | Co.od | L | B | 4 |
| BURSERACEAE | *Bursera simaruba* | Bu.si | L | B | 1 |
| *Protium copal* | Pr.co | L | B | 7 |
| CAPPARACEAE | *Capparis quiringuensis* | Ca.qu | I | B | 1 |
| CHRYSOBALANACEAE | *Hirtella americana* | Hi.am | I | B | 15 |
| *Licania hypoleuca* | Li.hy | I | B | 8 |
| *Licania platypus* | Li.pl | S | B | 1 |
| CLUSIACEAE | *Calophyllum brasilense* | Ca.br | S | B | 10 |
| *Garcinia intermedia* | Ga.in | I | B | 4 |
| EUPHORBIACEAE | *Croton schiedeanus* | Cr.sc | L | B | 11 |
| FABACEAE | *Acacia mayana* | Ac.ma | S | B | 12 |
| *Albizia leucocalyx* | Al.le | S | A | 5 |
| *Andira inermis* | An.in | S | B | 4 |
| *Cojoba arboreum* | Co.ar | S | B | 4 |
| *Dialium guianense* | Di.gu | L | B | 10 |
| *Inga dulis* | In.du | L | B | 3 |
| *Inga pavoneana* | In.pa | L | B | 1 |
| *Inga punctata* | In.pu | L | B | 418 |
| *Inga sp* | In.sp | L | B | 4 |
| *Inga vera* | In.ve | L | B | 2 |
| *Lonchocarpus cruentus* | Lo.cr | L | A | 3 |
| *Lonchocarpus pubescens* | Lo.pu | L | A | 8 |
| *Platymiscium yucatanum* | Pl.yu | I | A | 10 |
| *Pterocarpus hayesii* | Pt.ha | S | A | 1 |
| *Pterocarpus yucatanum* | Pt.yu | S | A | 1 |
| ICACINACEAE | *Calatola costaricanum* | Ca.co |  | B | 3 |
| LASCISTEMATACEAE | *Lacistema agreggatum* | La.ag | S | B | 2 |
| LAURACEAE | *Licaria capitata* | Li.ca | S | B | 8 |
| *Nectandra ambigiens* | Ne.am | S | B | 17 |
| *Nectandra reticulata* | Ne.re | S | B | 5 |
| MALVACEAE | *Hampea stipitata* | Ha.st | I | B | 4 |
| *Luehea seemannii* | Lu.se | L | A | 4 |
| *Quararibea funebris* | Qu.fu | S | B | 5 |
| MELIACEAE | *Cederela odorata* | Ce.od | L | A | 3 |
| *Guarea excelsa* | Gu.ex | I | B | 9 |
| *Guarea glabra* | Gu.gl | I | B | 10 |
| *Guarea grandifolia* | Gu.gr | I | B | 5 |
| *Trichilia havanensis* | Tr.ha | S | B | 3 |
| MORACEAE | *Brosimum alicastrum* | Br.al | S | B | 177 |
| *Brosimum latescens* | Br.la | S | B | 20 |
| *Castilla elastica* | Ca.el | L | B | 32 |
| *Maclura tinctoria* | Ma.ti | S | B | 3 |
| *Trophis racemosa* | Tr.ra | S | B | 94 |
| MYRTACEAE | *Eugenia edulis* | Eu.ed | S | B | 4 |
| *Eugenia mexicana* | Eu.me | S | B | 56 |
| *Eugenia nigrita* | Eu.ni | S | B | 5 |
| POLYGONACEAE | *Coccoloba barbadensis* | Co.ba | I | B | 1 |
| PRIMULACEAE | *Ardisia paschalis* | Ar.pa | I | B | 30 |
| RUBIACEAE | *Faramea occidentalis* | Fa.oc | S | B | 20 |
| *Posoqueria latifolia* | Po.la | S | B | 18 |
| SALICACEAE | *Pleuranthodendron lindenii* | Pl.li | L | B | 18 |
| SAPINDACEAE | *Cupania dentata* | Cu.de | S | B | 8 |
| *Cupania glabra* | Cu.gl | S | B | 15 |
| *Sapindus saponaria* | Sa.sa | L | B | 1 |
| SAPOTACEAE | *Chrysophyllum mexicanum* | Ch.me | S | B | 10 |
| *Pouteria durlandii* | Po.du | S | B | 5 |
| ULMACEAE | *Ampelocera hottlei* | Am.ho | S | B | 176 |
| VOCHYSIACEAE | *Vochysia guatemalensis* | Vo.gu | S | A | 8 |

Funtional groups by light requirements: Light demanding (L), Shade tolerant (S), Intermediate (I); and dispersal syndrome: Abiotic (A) Biotic (B).
