# Supplementary material for: Fire and Landscape Configuration Shape Forest Futures: Direct and Indirect Drivers of Seedling Diversity in a Human-Modified Tropical Rainforest
Source: Research Square preprint supplement (doi:10.21203/rs.3.rs-7430288/v1), 2025-09-10
Supplement: Supplementary file 3 [file 22bd3f722e740b801cea43e1.docx]

**Fire and Landscape Configuration Shape Forest Futures: Direct and Indirect Drivers of Seedling Diversity in a Human-Modified Tropical Rainforest**

*Landscape Ecology*

Sergio Nicasio-Arzeta, Susana Maza-Villalobos, Aline Pingarroni, Isela Zermeño-Hernández and Julieta Benítez-Malvido

Corresponding author: Susana Maza-Villalobos

El Colegio de la Frontera Sur, Unidad San Cristóbal de Las Casas, Carretera Panamericana y Periférico Sur s/n. Barrio María Auxiliadora, C.P. 29290, San Cristóbal de Las Casas, Chiapas.Email address: [sumaza@ecosur.mx](mailto:sumaza@ecosur.mx)

**Table S8**. Pearson correlation matrix among explanatory variables

|  | DF | DM | TBA | TA | T0D | T1D | T2D | PSZ |
| --- | --- | --- | --- | --- | --- | --- | --- | --- |
| DM | 0.001 |  |  |  |  |  |  |  |
| TBA | -0.63** | 0.35 |  |  |  |  |  |  |
| TA | -0.25 | 0.27 | 0.73** |  |  |  |  |  |
| T0D | 0.014 | 0.23 | 0.32 | 0.49 |  |  |  |  |
| T1D | 0.31 | 0.16 | -0.09 | 0.14 | 0.88*** |  |  |  |
| T2D | 0.46 | 0.06 | -0.31 | -0.05 | 0.72** | 0.95*** |  |  |
| PSZ | 0.23 | -0.46 | -0.14 | -0.12 | 0.25 | 0.41 | 0.49 |  |
| PSI | 0.58* | -0.21 | -0.13 | 0.31 | 0.28 | 0.35 | 0.40 | 0 |

* *P* < 0.05; ** *P* < 0.01; *** *P* < 0.001.
