# Supplementary material for: Fire and Landscape Configuration Shape Forest Futures: Direct and Indirect Drivers of Seedling Diversity in a Human-Modified Tropical Rainforest
Source: Research Square preprint supplement (doi:10.21203/rs.3.rs-7430288/v1), 2025-09-10
Supplement: Supplementary file 4 [file 2ec0efd470ccccbf66f43592.docx]

**Fire and Landscape Configuration Shape Forest Futures: Direct and Indirect Drivers of Seedling Diversity in a Human-Modified Tropical Rainforest**

*Landscape Ecology*

Sergio Nicasio-Arzeta, Susana Maza-Villalobos, Aline Pingarroni, Isela Zermeño-Hernández and Julieta Benítez-Malvido

Corresponding author: Susana Maza-Villalobos

El Colegio de la Frontera Sur, Unidad San Cristóbal de Las Casas, Carretera Panamericana y Periférico Sur s/n. Barrio María Auxiliadora, C.P. 29290, San Cristóbal de Las Casas, Chiapas.Email address: [sumaza@ecosur.mx](mailto:sumaza@ecosur.mx)

**Table S7.** Relative importance and significance of disturbance and landscape variables for each patch structural variable

| Patch | Variable | *β* (SE) | ∑ *wi* |
| --- | --- | --- | --- |
| DF | **PD600** | **-0.532 (0.528)** | **0.754** |
| DM | **FC1200** | **-0.611 (0.424)** | **1** |
| **PD900** | **-0.41 (0.38)** | **0.827** |
| PSZ | -0.138 (0.381) | 0.127 |
| TBA | **DF** | **-0.575 (0.494)** | **0.919** |
| EC1100 | -0.394 (0.493) | 0.552 |
| PSZ | -0.032 (0.517) | 0.114 |
| T1D | DF | 0.306 (0.551) | 0.248 |
| FC700 | 0.486 (0.563) | 0.596 |
| PSZ | 0.329 (0.661) | 0.222 |
| PSZ | **AI600** | **0.611 (0.516)** | **0.834** |
| DF | 0.223 (0.507) | 0.308 |
| PD1100 | 0.396 (0.653) | 0.202 |
| PSI | **DF** | **0.541 (0.452)** | **1** |
| **PD900** | **-0.473 (0.435)** | **0.808** |
