# Supplementary material for: Fire and Landscape Configuration Shape Forest Futures: Direct and Indirect Drivers of Seedling Diversity in a Human-Modified Tropical Rainforest
Source: Research Square preprint supplement (doi:10.21203/rs.3.rs-7430288/v1), 2025-09-10
Supplement: Supplementary file 5 [file 3d1e048b8e5f086c998610ff.docx]

**Fire and Landscape Configuration Shape Forest Futures: Direct and Indirect Drivers of Seedling Diversity in a Human-Modified Tropical Rainforest**

*Landscape Ecology*

Sergio Nicasio-Arzeta, Susana Maza-Villalobos, Aline Pingarroni, Isela Zermeño-Hernández and Julieta Benítez-Malvido

Corresponding author: Susana Maza-Villalobos

El Colegio de la Frontera Sur, Unidad San Cristóbal de Las Casas, Carretera Panamericana y Periférico Sur s/n. Barrio María Auxiliadora, C.P. 29290, San Cristóbal de Las Casas, Chiapas.Email address: [sumaza@ecosur.mx](mailto:sumaza@ecosur.mx)


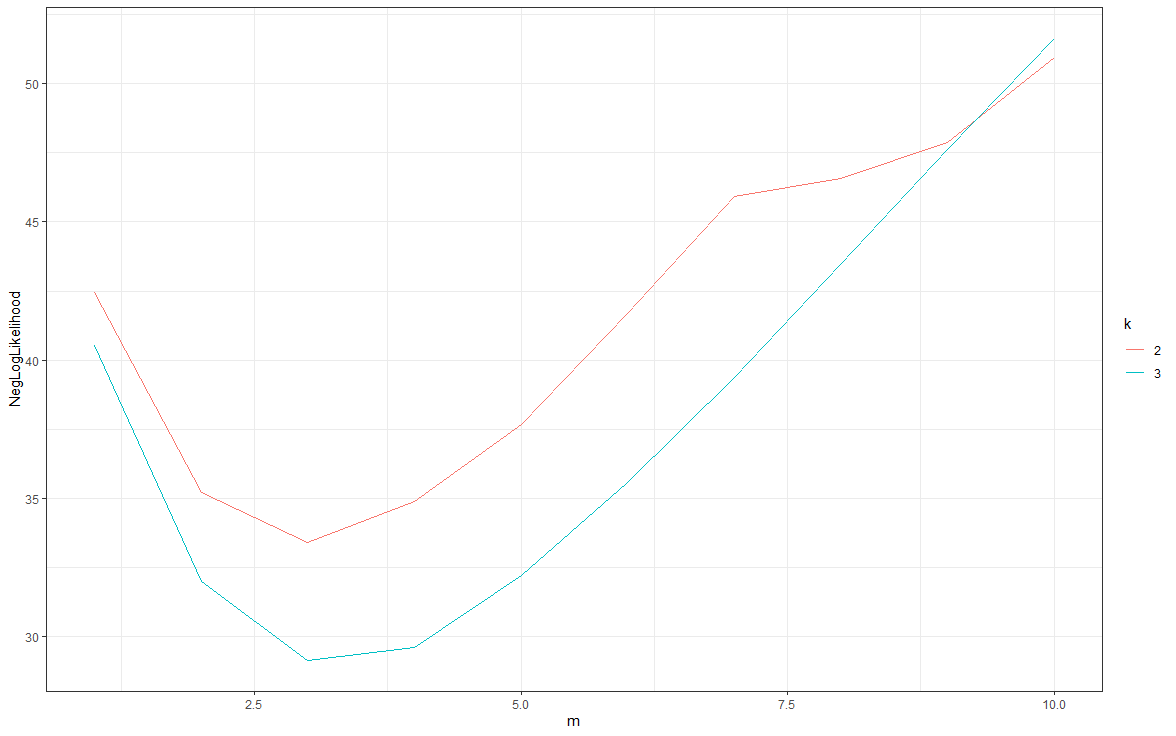


**Fig S2.** Association between the tunning parameter (*m*) and the negative Log-likelihood of models with varying *m* values. The red line represents a logistic PCA of two dimensions and the blue line a PCA of three dimensions.
