# Supplementary material for: Fire and Landscape Configuration Shape Forest Futures: Direct and Indirect Drivers of Seedling Diversity in a Human-Modified Tropical Rainforest
Source: Research Square preprint supplement (doi:10.21203/rs.3.rs-7430288/v1), 2025-09-10
Supplement: Supplementary file 6 [file 64562ea9362ab8ed8a09e96d.docx]

**Fire and Landscape Configuration Shape Forest Futures: Direct and Indirect Drivers of Seedling Diversity in a Human-Modified Tropical Rainforest**

*Landscape Ecology*

Sergio Nicasio-Arzeta, Susana Maza-Villalobos, Aline Pingarroni, Isela Zermeño-Hernández and Julieta Benítez-Malvido

Corresponding author: Susana Maza-Villalobos

El Colegio de la Frontera Sur, Unidad San Cristóbal de Las Casas, Carretera Panamericana y Periférico Sur s/n. Barrio María Auxiliadora, C.P. 29290, San Cristóbal de Las Casas, Chiapas.Email address: [sumaza@ecosur.mx](mailto:sumaza@ecosur.mx)

**Table S3.** Binary data of disturbance factors of the 16 forest patches in the Lacandona rainforest, southeast Mexico.

| Patch | Flood | Fire | Slash | Cow | Use |
| --- | --- | --- | --- | --- | --- |
| 1 | 0 | 1 | 0 | 0 | 1 |
| 2 | 1 | 0 | 1 | 1 | 1 |
| 3 | 0 | 0 | 1 | 1 | 1 |
| 4 | 1 | 1 | 0 | 1 | 1 |
| 5 | 1 | 1 | 1 | 1 | 1 |
| 6 | 0 | 0 | 1 | 1 | 1 |
| 7 | 1 | 0 | 1 | 1 | 1 |
| 8 | 0 | 0 | 1 | 1 | 0 |
| 9 | 0 | 1 | 0 | 0 | 0 |
| 10 | 1 | 1 | 1 | 0 | 0 |
| 11 | 0 | 0 | 0 | 0 | 0 |
| 12 | 1 | 0 | 0 | 0 | 1 |
| 13 | 0 | 0 | 0 | 0 | 0 |
| 14 | 1 | 0 | 0 | 0 | 0 |
| 15 | 1 | 1 | 0 | 1 | 0 |
| 16 | 1 | 1 | 0 | 1 | 1 |

The disturbance factors are the following: flooding during rainy season (*Flood*: 0 = no; 1 = yes), fire events during the last 10 years (*Fire*: 0 = no; 1 = yes), presence of cattle (*Cow*: 0 = cattle do not enter to the patch; 1 = cattle roams within the patch), understory vegetation (*Slash*: 0 = non-slashed; 1 = slashed) and the predominant land use in the adjacent matrix (*Use*: 0 = temporal agriculture; 1 = cattle pasture)
