# Supplementary material for: Fire and Landscape Configuration Shape Forest Futures: Direct and Indirect Drivers of Seedling Diversity in a Human-Modified Tropical Rainforest
Source: Research Square preprint supplement (doi:10.21203/rs.3.rs-7430288/v1), 2025-09-10
Supplement: Supplementary file 7 [file 7095a0be6c12a1602e78cea5.docx]

**Fire and Landscape Configuration Shape Forest Futures: Direct and Indirect Drivers of Seedling Diversity in a Human-Modified Tropical Rainforest**

*Landscape Ecology*

Sergio Nicasio-Arzeta, Susana Maza-Villalobos, Aline Pingarroni, Isela Zermeño-Hernández and Julieta Benítez-Malvido

Corresponding author: Susana Maza-Villalobos

El Colegio de la Frontera Sur, Unidad San Cristóbal de Las Casas, Carretera Panamericana y Periférico Sur s/n. Barrio María Auxiliadora, C.P. 29290, San Cristóbal de Las Casas, Chiapas.Email address: [sumaza@ecosur.mx](mailto:sumaza@ecosur.mx)

**Table S9.** Best-fitted structural equation models for seedling composition and diversity in 16 forest patches in the Lacandona rainforest, southeast Mexico.

| Model | Exogenous variables | *χ 2* | *df* | *P* | AICc | *Δ*i |
| --- | --- | --- | --- | --- | --- | --- |
| Seedling composition | TBA | 15.78 | 10 | 0.11 | -178.5 | 0 |
| DM | 22.6 | 16 | 0.12 | -152.24 | 26.26 |
| PSZ | 8.54 | 8 | 0.38 | -134.78 | 43.72 |
| PSZ, PSI | 37.27 | 32 | 0.24 | -108.88 | 69.62 |
| TBA, DM | 41.19 | 30 | 0.08 | -107.94 | 70.56 |
| TBA, PSZ | 25.7 | 22 | 0.26 | -100.55 | 77.95 |
| DM, PSZ | 32.35 | 30 | 0.35 | -98.51 | 79.99 |
| TBA, T1D | 19.37 | 12 | 0.08 | -97.82 | 80.68 |
| DM, PSI | 30.33 | 30 | 0.45 | -96.35 | 82.14 |
| TBA, PSI | 20.44 | 20 | 0.43 | -89.65 | 88.85 |
| All-species diversity | PSZ | 9.15 | 8 | 0.33 | -136.39 | 0 |
| DM | 11.2 | 16 | 0.8 | -126.17 | 10.23 |
| DM, T1D | 38.9 | 32 | 0.19 | -110.74 | 25.65 |
| DM, PSI | 33.53 | 30 | 0.3 | -99.77 | 36.62 |
| TBA, DM | 29.68 | 30 | 0.48 | -95.66 | 40.73 |
| DM, PSZ | 25.15 | 30 | 0.72 | -90.83 | 45.56 |
| Typical-species diversity | TBA | 15.35 | 10 | 0.12 | -177.11 | 0 |
| DM | 18.56 | 16 | 0.29 | -143 | 34.12 |
| PSZ | 8.47 | 8 | 0.39 | -134.59 | 42.53 |
| DM, T1D | 45.67 | 32 | 0.06 | -118.48 | 58.63 |
| DM, PSI | 42.3 | 30 | 0.07 | -109.12 | 67.99 |
| TBA, DM | 34.37 | 30 | 0.27 | -100.66 | 76.45 |
| DM, PSZ | 29.39 | 30 | 0.5 | -95.35 | 81.76 |
| TBA, PSZ | 20.78 | 22 | 0.53 | -94.5 | 82.62 |
| TBA, T1D | 14.52 | 12 | 0.27 | -91.36 | 85.76 |
| TBA, PSI | 21.52 | 20 | 0.37 | -90.89 | 86.23 |
| Dominant-species diversity | TBA | 13.84 | 10 | 0.18 | -172.29 | 0 |
| DM | 16.25 | 16 | 0.44 | -137.71 | 34.59 |
| PSZ | 6.23 | 8 | 0.62 | -128.62 | 43.67 |
| DM, T1D | 38.14 | 32 | 0.21 | -109.87 | 62.42 |
| PSZ, PSI | 38.05 | 32 | 0.21 | -109.77 | 62.52 |
| DM, PSI | 37.03 | 30 | 0.18 | -103.5 | 68.79 |
| TBA, DM | 31.1 | 30 | 0.41 | -97.17 | 75.12 |
| TBA, PSZ | 18.75 | 22 | 0.66 | -92 | 80.29 |
| DM, PSZ | 24.83 | 30 | 0.73 | -90.48 | 81.81 |
| TBA, T1D | 12.7 | 12 | 0.39 | -88.94 | 83.35 |

Results of the alternative models that fitted selection criteria for each index of seedling composition and diversity and the exogenous variables included in each model (patch size: PSZ, patch shape: PSI, tree basal area: TBA, tree diversity: T1D and patch disturbance by management: DM). Given are the degrees of freedom (*df*), Fisher’s C value statistic (*χ*2) and p-value (*P*), Akaike Information Criterion corrected for small samples (AICc), and AICc differences compared to be best-supported model by data (*Δ*i).
