# Supplementary material for: Fire and Landscape Configuration Shape Forest Futures: Direct and Indirect Drivers of Seedling Diversity in a Human-Modified Tropical Rainforest
Source: Research Square preprint supplement (doi:10.21203/rs.3.rs-7430288/v1), 2025-09-10
Supplement: Supplementary file 8 [file 7121a88722de8713ca97577b.docx]

**Fire and Landscape Configuration Shape Forest Futures: Direct and Indirect Drivers of Seedling Diversity in a Human-Modified Tropical Rainforest**

*Landscape Ecology*

Sergio Nicasio-Arzeta, Susana Maza-Villalobos, Aline Pingarroni, Isela Zermeño-Hernández and Julieta Benítez-Malvido

Corresponding author: Susana Maza-Villalobos

El Colegio de la Frontera Sur, Unidad San Cristóbal de Las Casas, Carretera Panamericana y Periférico Sur s/n. Barrio María Auxiliadora, C.P. 29290, San Cristóbal de Las Casas, Chiapas.Email address: [sumaza@ecosur.mx](mailto:sumaza@ecosur.mx)

**Table S6.** Landscape metrics selected from the multi-scale assessment for each patch structural variable

| Patch structure | Landscape metric | Radius (m) | R2 |
| --- | --- | --- | --- |
| DF | PD | 600 | 0.23 |
| DM | FC | 1200 | 0.59 |
| PD | 900 | 0.44 |
| TBA | EC | 1100 | 0.21 |
| T1D | FC | 700 | 0.27 |
| PSZ | PD | 1100 | 0.22 |
| AI | 600 | 0.36 |
| PSI | PD | 900 | 0.23 |
