# Supplementary material for: Fire and Landscape Configuration Shape Forest Futures: Direct and Indirect Drivers of Seedling Diversity in a Human-Modified Tropical Rainforest
Source: Research Square preprint supplement (doi:10.21203/rs.3.rs-7430288/v1), 2025-09-10
Supplement: Supplementary file 9 [file 786e23361d4c5f38e28a644a.docx]

**Fire and Landscape Configuration Shape Forest Futures: Direct and Indirect Drivers of Seedling Diversity in a Human-Modified Tropical Rainforest**

*Landscape Ecology*

Sergio Nicasio-Arzeta, Susana Maza-Villalobos, Aline Pingarroni, Isela Zermeño-Hernández and Julieta Benítez-Malvido

Corresponding author: Susana Maza-Villalobos

El Colegio de la Frontera Sur, Unidad San Cristóbal de Las Casas, Carretera Panamericana y Periférico Sur s/n. Barrio María Auxiliadora, C.P. 29290, San Cristóbal de Las Casas, Chiapas.Email address: [sumaza@ecosur.mx](mailto:sumaza@ecosur.mx)

**Table S2.** Formulas employed to estimate Hill numbers of seedling α- and β-diversity in the Lacandona rainforest, southeast Mexico.

| Diversity | Order | Formula |
| --- | --- | --- |
| Gamma | 0*D*γ  2*D*γ |  |
| 1*D*γ |  |
| Alpha | 0*D*α  2*D*α |  |
| 1*D*α |  |
| Beta | 0*D*β  1*D*β  2*D*β |  |

where *pi* denotes the relative abundance of the *i*th species in each of the *N* 1-m2 plots, denotes the mean relative abundance of the *i*th species in the *N* 1-m2 plots and *q* is a parameter that determines the sensitivity of the measure to the relative abundances (Jost, 2007; Tuomisto, 2010).

References:

Jost, L. (2007). Partitioning diversity into independent alpha and beta components. *Ecology*, *88*(10), 2427–2439. https://doi.org/10.1890/06-1736.1

Tuomisto, H. (2010). A diversity of beta diversities: Straightening up a concept gone awry. Part 1. Defining beta diversity as a function of alpha and gamma diversity. *Ecography*, *33*(1), 2–22. https://doi.org/10.1111/j.1600-0587.2009.05880.x
