# Supplementary material for: Fire and Landscape Configuration Shape Forest Futures: Direct and Indirect Drivers of Seedling Diversity in a Human-Modified Tropical Rainforest
Source: Research Square preprint supplement (doi:10.21203/rs.3.rs-7430288/v1), 2025-09-10
Supplement: Supplementary file 11 [file cfa2e18bec1b57a4072878e2.docx]

**Fire and Landscape Configuration Shape Forest Futures: Direct and Indirect Drivers of Seedling Diversity in a Human-Modified Tropical Rainforest**

*Landscape Ecology*

Sergio Nicasio-Arzeta, Susana Maza-Villalobos, Aline Pingarroni, Isela Zermeño-Hernández and Julieta Benítez-Malvido

Corresponding author: Susana Maza-Villalobos

El Colegio de la Frontera Sur, Unidad San Cristóbal de Las Casas, Carretera Panamericana y Periférico Sur s/n. Barrio María Auxiliadora, C.P. 29290, San Cristóbal de Las Casas, Chiapas.Email address: [sumaza@ecosur.mx](mailto:sumaza@ecosur.mx)

**Table S10.** Test statistics for the single best model for each index of seedling composition and diversity in 16 forest patches in the Lacandona rainforest, southeast Mexico.

| Seedling variable | Response | Predictor | *βi* | SE | df | *t* | *P* | *β’i* |
| --- | --- | --- | --- | --- | --- | --- | --- | --- |
| Composition | TBA | **DF** | **-8.069** | **2.683** | **14** | **-3.007** | **0.009** | **-0.626** |
| LD | **TBA** | **-0.007** | **0.003** | **14** | **-2.426** | **0.029** | **-0.544** |
| ST | LD | -1.694 | 1.273 | 13 | -1.331 | 0.206 | -0.412 |
| TBA | -0.009 | 0.017 | 13 | -0.499 | 0.626 | -0.154 |
| MDS1 | **LD** | **-0.504** | **0.201** | **12** | **-2.504** | **0.028** | **-0.547** |
| ST | 0.028 | 0.041 | 12 | 0.685 | 0.507 | 0.126 |
| TBA | 0.004 | 0.002 | 12 | 1.487 | 0.163 | 0.308 |
| MDS2 | LD | -0.02 | 0.186 | 12 | -0.108 | 0.916 | -0.026 |
| **ST** | **-0.141** | **0.038** | **12** | **-3.713** | **0.003** | **-0.758** |
| TBA | 0.001 | 0.002 | 12 | 0.341 | 0.739 | 0.078 |
| All-species diversity | PSZ | **AI600** | **0.335** | **0.108** | **14** | **3.083** | **0.008** | **0.636** |
| LD | PSZ | 0.17 | 0.134 | 14 | 1.267 | 0.226 | 0.321 |
| ST | **LD** | **-2.384** | **0.893** | **12** | **-2.669** | **0.02** | **-0.579** |
| PSZ | 0.177 | 0.574 | 12 | 0.308 | 0.763 | 0.081 |
| **AI600** | **0.726** | **0.306** | **12** | **2.372** | **0.035** | **0.632** |
| 0α | LD | 0.353 | 0.28 | 12 | 1.26 | 0.232 | 0.308 |
| **ST** | **0.157** | **0.068** | **12** | **2.326** | **0.038** | **0.564** |
| PSZ | 0.154 | 0.147 | 12 | 1.046 | 0.316 | 0.253 |
| 0β | LD | -0.514 | 0.346 | 12 | -1.484 | 0.164 | -0.467 |
| ST | -0.057 | 0.084 | 12 | -0.688 | 0.505 | -0.214 |
| PSZ | 0.198 | 0.182 | 12 | 1.086 | 0.299 | 0.338 |
| Typical-species diversity | TBA | **DF** | **-8.069** | **2.683** | **14** | **-3.007** | **0.009** | **-0.626** |
| LD | **TBA** | **-0.007** | **0.003** | **14** | **-2.426** | **0.029** | **-0.544** |
| ST | LD | -1.694 | 1.273 | 13 | -1.331 | 0.206 | -0.412 |
| TBA | -0.009 | 0.017 | 13 | -0.499 | 0.626 | -0.154 |
| 1α | LD | 0.026 | 0.24 | 12 | 0.107 | 0.917 | 0.03 |
| **ST** | **0.111** | **0.049** | **12** | **2.258** | **0.043** | **0.539** |
| TBA | -0.004 | 0.003 | 12 | -1.369 | 0.196 | -0.368 |
| 1β | **LD** | **-1.339** | **0.277** | **12** | **-4.84** | **0** | **-1.011** |
| ST | -0.117 | 0.056 | 12 | -2.069 | 0.061 | -0.364 |
| TBA | -0.006 | 0.004 | 12 | -1.681 | 0.119 | -0.333 |
| Dominant-species diversity | TBA | **DF** | **-8.069** | **2.683** | **14** | **-3.007** | **0.009** | **-0.626** |
| LD | **TBA** | **-0.007** | **0.003** | **14** | **-2.426** | **0.029** | **-0.544** |
| ST | LD | -1.694 | 1.273 | 13 | -1.331 | 0.206 | -0.412 |
| TBA | -0.009 | 0.017 | 13 | -0.499 | 0.626 | -0.154 |
| 2α | LD | -0.07 | 0.214 | 12 | -0.325 | 0.751 | -0.096 |
| ST | 0.083 | 0.044 | 12 | 1.895 | 0.082 | 0.47 |
| TBA | -0.004 | 0.003 | 12 | -1.442 | 0.175 | -0.403 |
| 2β | **LD** | **-0.987** | **0.214** | **12** | **-4.613** | **0.001** | **-0.944** |
| **ST** | **-0.108** | **0.044** | **12** | **-2.479** | **0.029** | **-0.427** |
| TBA | -0.002 | 0.003 | 12 | -0.759 | 0.463 | -0.147 |

The response and predictor variables are patch size (PSZ), patch shape (PSI), tree basal area (TBA), patch disturbance by fire (DF), abundance of light-demanding seedlings (LD), abundance of shade-tolerant seedlings (ST), and alpha and beta diversity of all species (0α,0β), typical species (1α,1β) and dominant species (2α,2β). Given are unstandardized path coefficients (*βi*) and associated standard error (SE), degrees of freedom (*df*), t-value (*t*), p-value (*P*) and standardized path coefficients (*β’i*). The significant paths are highlighted in bold.
