# Supplementary material for: Fire and Landscape Configuration Shape Forest Futures: Direct and Indirect Drivers of Seedling Diversity in a Human-Modified Tropical Rainforest
Source: Research Square preprint supplement (doi:10.21203/rs.3.rs-7430288/v1), 2025-09-10
Supplement: Supplementary file 12 [file e4192074fb3d44215cdac05d.docx]

**Fire and Landscape Configuration Shape Forest Futures: Direct and Indirect Drivers of Seedling Diversity in a Human-Modified Tropical Rainforest**

*Landscape Ecology*

Sergio Nicasio-Arzeta, Susana Maza-Villalobos, Aline Pingarroni, Isela Zermeño-Hernández and Julieta Benítez-Malvido

Corresponding author: Susana Maza-Villalobos

El Colegio de la Frontera Sur, Unidad San Cristóbal de Las Casas, Carretera Panamericana y Periférico Sur s/n. Barrio María Auxiliadora, C.P. 29290, San Cristóbal de Las Casas, Chiapas.Email address: [sumaza@ecosur.mx](mailto:sumaza@ecosur.mx)

**Table S4.** Spearman correlation matrix between disturbance factors and logistic PCA components.

|  | Flood | Fire | Slash | Use | Cow | PC1 | PC2 | PC3 |
| --- | --- | --- | --- | --- | --- | --- | --- | --- |
| Flood | 1 |  |  |  |  |  |  |  |
| Fire | 0.27 | 1 |  |  |  |  |  |  |
| Slash | 0.016 | -0.27 | 1 |  |  |  |  |  |
| Use | 0.238 | 0.016 | 0.27 | 1 |  |  |  |  |
| Cow | 0.238 | 0.016 | 0.524* | 0.492 | 1 |  |  |  |
| PC1 | 0.397 | -0.123 | 0.699** | 0.726** | 0.863*** | 1 |  |  |
| PC2 | 0.644** | 0.863*** | -0.425 | 0.151 | 0.014 | -0.027 | 1 |  |
| PC3 | -0.452 | 0.069 | -0.206 | 0.617* | 0.069 | 0.062 | -0.024 | 1 |

* *P* < 0.05; ** *P* < 0.01; *** *P* < 0.001
